# Supplementary material for: Gas–surface energy exchange and thermal accommodation of CO2 and Ar in collisions with methyl, hydroxyl, and perfluorinated self-assembled monolayers
Source: Royal Society of Chemistry journal article supplement (doi:10.1039/b921893a), 2010-01-01
Supplement: b921893a.pdf [file b921893a.pdf]

## Supplementary Information

### Gas-Surface Energy Exchange and Thermal Accommodation in Collisions of CO<sub>2</sub> and Ar with Methyl, Hydroxyl, and Perfluorinated Self-Assembled Monolayers

*Jessica W. Lu, William A. Alexander and John R. Morris*

*Department of Chemistry, Virginia Tech, Blacksburg Virginia, 24060*

**Potential Energy Wells Depths.** Determination of the minimum energy on the gas/surface potential energy surface can aid in understanding of energy exchange and accommodation and can be facilitated through *ab initio* electronic structure calculations. In place of a simulated surface, the calculations here used CO<sub>2</sub> and Ar and CH<sub>4</sub>, CH<sub>3</sub>OH, and CF<sub>4</sub> in an effort to approximately evaluate a trend for minimum well depths for Ar and CO<sub>2</sub> at a distance from the CH<sub>3</sub>-, OH-, and F-SAM surface.

Second-order Möller-Plesset perturbation theory (MP2) combined with Dunning's double- $\xi$  correlation-consistent basis set augmented with diffuse functions (aug-cc-pVDZ) was used to calculate minimum energy wells for Ar and CO<sub>2</sub> interacting with CH<sub>4</sub>, CH<sub>3</sub>OH, and CF<sub>4</sub>, small molecule analogues of the terminal groups of the CH<sub>3</sub>-SAM, OH-SAM, and F-SAM, respectively. Similar calculations have been previously performed for Ar with CH<sub>4</sub>,<sup>1</sup> CF<sub>4</sub>,<sup>1</sup> and CH<sub>3</sub>OH,<sup>2</sup> and CO<sub>2</sub> with CF<sub>4</sub>.<sup>3</sup> The motivation for the basic reproduction of these calculations here is two-fold: to compute similar values for CO<sub>2</sub>, and to focus on the trends rather than absolute values. Corrections for basis-set superposition error (BSSE) were done by applying the counterpoise method.<sup>4</sup> The Gaussian03 suite of programs was used to perform all calculations for depths of potential wells and well-minimum approach distances.<sup>5</sup> The minimum well depth of the approach calculated for Ar-CH<sub>4</sub> is found to be -1.18 kJ/mol, when Ar approaches the carbon on the face of the methane molecule along one of the C-H bonds. CO<sub>2</sub> interactions were

calculated for the molecule approaching the methane face with its CO bonds perpendicular to the C-H bond. The interactions of Ar and CO<sub>2</sub> with CF<sub>4</sub> were calculated with analogous approach geometries to those of methane.

The geometry used for the Ar – CH<sub>3</sub>OH calculations involves Ar approaching methanol at the O-atom at an angle that bisects the H-O-C angle. The minimum well depth for CO<sub>2</sub> and CH<sub>3</sub>OH shows the C-atom approaching the O-atom as to bisect the H-O-C angle, with each of the C-O bonds on CO<sub>2</sub> positioned perpendicular to the axis that intersects the C-atom of CO<sub>2</sub> and O-atom of CH<sub>3</sub>OH; here, CO<sub>2</sub> is coplanar to H-O-C on CH<sub>3</sub>OH. The calculated well depths are listed in Table 3 of the article.

Ar interaction with the CF<sub>4</sub> molecule results in a well depth of -1.41 kJ/mol. Well depths for Ar with CH<sub>4</sub> and CH<sub>3</sub>OH are -1.18 and -1.08 kJ/mol, making all Ar wells at these approaches approximately the same. CO<sub>2</sub>, in contrast, forms deeper wells with CH<sub>4</sub> and CH<sub>3</sub>OH at these approach geometries, -2.90 kJ/mol and -11.95 kJ/mol respectively. As approximated by the potential well depth formed between CO<sub>2</sub> and CF<sub>4</sub>, the strength of the CO<sub>2</sub> interaction with the F-SAM is about as strong as the well depth formed between CO<sub>2</sub> and CH<sub>4</sub>, as approximated by the potential well depth formed between CO<sub>2</sub> and CF<sub>4</sub>.

## REFERENCES

- (S1) Alexander, W. A.; Troya, D. *J. Phys. Chem. A* 2006, *110*, 10834-10843.
- (S2) Tasic, U.; Alexeev, Y.; Vayner, G.; Crawford, T. D.; Windus, T. L.; Hase, W. L. *Phys. Chem. Chem. Phys.* 2006, *8*.
- (S3) Martinez-Nunez, E.; Rahaman, A.; Hase, W. L. *J. Phys. Chem. C* 2007, *111*, 354-364.
- (S4) Boys, S. F.; Bernardi, F. *Mol. Phys.* 2002, *100*, 65.

(S5) Frisch, M. J.; Rucks, G. W.; Schlegel, H. B.; Scuseria, G. E.; Robb, M. A.; Cheeseman, J. R.; Montgomery, J. J. A.; Vreven, T.; Kudin, K. N.; Burant, J. C.; Millam, J. M.; Iyengar, S. S.; Tomasi, J.; Barone, V.; Mennucci, B.; Cossi, M.; Scalamani, G.; Rega, N.; Petersson, G. A.; Nakatsuji, H.; Hada, M.; Ehara, M.; Toyota, K.; Fukuda, R.; Hasegawa, J.; Ishida, M.; Nakajima, T.; Honda, Y.; Kitao, O.; Nakai, H.; Klene, M.; Li, X.; Knox, J. E.; Hratchian, H. P.; Cross, J. B.; Bakken, V.; Adamo, C.; Jaramillo, J.; Gomperts, R.; Stratmann, R. E.; Yazyev, O.; Austin, A. J.; Cammi, R.; Pomelli, C.; Ochterski, J. W.; Ayala, P. Y.; Morokuma, K.; Voth, G. A.; Salvador, P.; Dannenberg, J. J.; Zakrewski, V. G.; Dapprich, S.; Daniels, A. D.; Strain, M. C.; Farkas, O.; Malick, D. K.; Rabuck, A. D.; Raghavachari, K.; Foresman, J. B.; Ortiz, J. V.; Cui, Q.; Baboul, A. G.; Clifford, S.; Cioslowski, J.; Stefanov, B. B.; Liu, G.; Liashenko, A.; Piskorz, P.; Komaromi, I.; Martin, R. L.; Fox, D. J.; Keith, T.; Al-Laham, M. A.; Peng, C. Y.; Nanayakkara, A.; Challacombe, M.; Gill, P. M. W.; Johnson, B.; Chen, W.; Wong, M. W.; Gonzalez, C.; Pople, J. A.; Gaussian Inc: Wallingford, CT, 2004.

**TABLE S1.**

| <b>Molecule/Monolayer</b> |                                        | <b>BC Fraction</b> | <b>Percent Energy Transferred</b><br>( $E_i - \langle E_f \rangle$ )/ $E_i * 100$ | <b>Final Energy IS</b><br>$\langle E_{IS} \rangle$ |
|---------------------------|----------------------------------------|--------------------|-----------------------------------------------------------------------------------|----------------------------------------------------|
| <b>50 kJ/mol</b>          | Ar, CH <sub>3</sub> -SAM               | 0.75 +/- 0.01      | 86.3 +/- 0.3 %                                                                    | 10.1 +/- 0.3                                       |
|                           | Ar, OH-SAM                             | 0.61 +/- 0.01      | 83.9 +/- 1.0 %                                                                    | 11.7 +/- 0.7                                       |
|                           | Ar, F-SAM                              | 0.39 +/- 0.01      | 74.6 +/- 0.8%                                                                     | 15.2 +/- 0.2                                       |
|                           | CO <sub>2</sub> , CH <sub>3</sub> -SAM | 0.82 +/- 0.01      | 88.5 +/- 0.4 %                                                                    | 10.4 +/- 0.2                                       |
|                           | CO <sub>2</sub> , OH-SAM               | 0.81 +/- 0.03      | 88.2 +/- 0.9%                                                                     | 11.5 +/- 0.2                                       |
|                           | CO <sub>2</sub> , F-SAM                | 0.45 +/- 0.01      | 78.0 +/- 0.4 %                                                                    | 14.8 +/- 0.6                                       |
| <b>78 kJ/mol</b>          | Ar, CH <sub>3</sub> -SAM               | 0.67 +/- 0.01      | 90.8 +/- 0.1 %                                                                    | 11.2 +/- 0.1                                       |
|                           | Ar, OH-SAM                             | 0.55 +/- 0.01      | 88.0 +/- 0.8 %                                                                    | 14.1 +/- 0.1                                       |
|                           | Ar, F-SAM                              | 0.32 +/- 0.01      | 79.7 +/- 0.4 %                                                                    | 19.5 +/- 0.4                                       |
|                           | CO <sub>2</sub> , CH <sub>3</sub> -SAM | 0.74 +/- 0.03      | 91.5 +/- 0.7 %                                                                    | 12.3 +/- 1.1                                       |
|                           | CO <sub>2</sub> , OH-SAM               | 0.67 +/- 0.02      | 90.5 +/- 0.9 %                                                                    | 13.3 +/- 0.8                                       |
|                           | CO <sub>2</sub> , F-SAM                | 0.36 +/- 0.01      | 82.7 +/- 0.2%                                                                     | 17.5 +/- 0.4                                       |
| <b>106 kJ/mol</b>         | Ar, CH <sub>3</sub> -SAM               | 0.62 +/- 0.02      | 92.5 +/- 0.4 %                                                                    | 12.1 +/- 0.4                                       |
|                           | Ar, OH-SAM                             | 0.45 +/- 0.02      | 89.6 +/- 0.4 %                                                                    | 14.8 +/- 0.5                                       |
|                           | Ar, F-SAM                              | 0.26 +/- 0.01      | 83.7 +/- 0.1 %                                                                    | 23.0 +/- 0.2                                       |
|                           | CO <sub>2</sub> , CH <sub>3</sub> -SAM | 0.68 +/- 0.02      | 93.0 +/- 0.2 %                                                                    | 11.9 +/- 0.1                                       |
|                           | CO <sub>2</sub> , OH-SAM               | 0.61 +/- 0.02      | 92.3 +/- 0.4 %                                                                    | 14.4 +/- 0.2                                       |
|                           | CO <sub>2</sub> , F-SAM                | 0.28 +/- 0.02      | 83.7 +/- 0.1 %                                                                    | 20.4 +/- 0.5                                       |
| <b>130 kJ/mol</b>         | Ar, CH <sub>3</sub> -SAM               | 0.59 +/- 0.01      | 93.9 +/- 0.2 %                                                                    | 12.0 +/- 0.1                                       |
|                           | Ar, OH-SAM                             | 0.44 +/- 0.01      | 91.0 +/- 0.1 %                                                                    | 16.2 +/- 0.3                                       |
|                           | Ar, F-SAM                              | 0.25 +/- 0.02      | 84.4 +/- 0.5 %                                                                    | 23.9 +/- 0.3                                       |
|                           | CO <sub>2</sub> , CH <sub>3</sub> -SAM | 0.65 +/- 0.01      | 93.9 +/- 0.1 %                                                                    | 12.9 +/- 0.1                                       |
|                           | CO <sub>2</sub> , OH-SAM               | 0.63 +/- 0.05      | 92.8 +/- 0.1 %                                                                    | 16.4 +/- 1.0                                       |
|                           | CO <sub>2</sub> , F-SAM                | 0.27 +/- 0.03      | 85.8 +/- 0.6%                                                                     | 21.9 +/- 0.3                                       |
